# **ChAdOx1 nCoV-19 (AZD1222) protects against SARS-CoV-2 B.1.351 and B.1.1.7**

Robert J. Fischer<sup>1†</sup>, Neeltje van Doremalen<sup>1†</sup>, Danielle R. Adney<sup>1†</sup>, Claude Kwe Yinda<sup>1</sup>, Julia R. Port<sup>1</sup>, Myndi G. Holbrook<sup>1</sup>, Jonathan E. Schulz<sup>1</sup>, Brandi N. Williamson<sup>1</sup>, Tina Thomas<sup>1</sup>, Kent Barbian<sup>2</sup>, Sarah L. Anzick<sup>2</sup>, Stacy Ricklefs<sup>2</sup>, Brian J. Smith<sup>3</sup>, Dan Long<sup>3</sup>, Craig Martens<sup>2</sup>, Greg Saturday<sup>3</sup>, Emmie de Wit<sup>1</sup>, Sarah C. Gilbert<sup>4</sup>, Teresa Lambe<sup>4</sup>, Vincent J. Munster<sup>1\*</sup>

1. Laboratory of Virology, National Institute of Allergy and Infectious Diseases, National Institutes of Health, Hamilton, MT, USA.

2. Research Technologies Branch, Rocky Mountain Laboratories, National Institutes of Health, Hamilton, Montana, USA.

3. Rocky Mountain Veterinary Branch, National Institute of Allergy and Infectious Diseases, National Institutes of Health, Hamilton, MT, USA.

4. The Jenner Institute, Nuffield Department of Medicine, University of Oxford, Oxford, UK.

†=These authors contributed equally

\*=Corresponding author

## Abstract

We investigated ChAdOx1 nCoV-19 (AZD1222) vaccine efficacy against SARS-CoV-2 variants of concern (VOCs) B.1.1.7 and B.1.351 in Syrian hamsters. We previously showed protection against SARS-CoV-2 disease and pneumonia in hamsters vaccinated with a single dose of ChAdOx1 nCoV-19. Here, we observed a 9.5-fold reduction of virus neutralizing antibody titer in vaccinated hamster sera against B.1.351 compared to B.1.1.7. Vaccinated hamsters challenged with B.1.1.7 or B.1.351 did not lose weight compared to control animals. In contrast to control animals, the lungs of vaccinated animals did not show any gross lesions. Minimal to no viral subgenomic RNA (sgRNA) and no infectious virus was detected in lungs of vaccinated animals. Histopathological evaluation showed extensive pulmonary pathology caused by B.1.1.7 or B.1.351 replication in the control animals, but none in the vaccinated animals. These data demonstrate the effectiveness of the ChAdOx1 nCoV-19 vaccine against clinical disease caused by B.1.1.7 or B.1.351 VOCs.

## Main

The COVID-19 pandemic produced an unprecedented development of SARS-CoV-2 vaccines, and just over a year after the beginning of the outbreak a total of 12 vaccines have been authorized or approved globally. As the pandemic progressed, several VOCs have been detected. These include the B.1.1.7 and B.1.351 VOCs. The B.1.1.7 VOC was first detected in the United Kingdom and has seven amino acid (AA) substitutions and two deletions in the spike protein<sup>1,2</sup> compared to the original Wuhan isolate, Wuhan-Hu-1. The B.1.351 VOC was first detected in South Africa and has eight AA substitutions and one deletion in the spike protein<sup>3</sup> (Table 1). All currently licensed vaccines are based on the spike protein of Wuhan-Hu-1, thus, concerns have

been raised that the presence of these changes may affect vaccine efficacy. The goal of this study was to evaluate ChAdOx1 nCoV-19 (AZD1222) vaccine efficacy in Syrian hamsters, when challenged using naturally occurring isolates of the VOCs B.1.1.7 and B.1.351.

| <b>Substitution (Wuhan AA numbering)</b> | <b>VOC B.1.1.7<sup>1</sup></b> | <b>VOC B.1.351<sup>3</sup></b> |
|------------------------------------------|--------------------------------|--------------------------------|
| <b>L18F</b>                              | -                              | +                              |
| <b>HV69-70del</b>                        | +                              | -                              |
| <b>D80A</b>                              | -                              | +                              |
| <b>Y144del</b>                           | +                              | -                              |
| <b>D215G</b>                             | -                              | +                              |
| <b>LAL242-244del</b>                     | -                              | +                              |
| <b>K417N</b>                             | -                              | +                              |
| <b>E484K</b>                             | -                              | +                              |
| <b>N501Y</b>                             | +                              | +                              |
| <b>A570D</b>                             | +                              | -                              |
| <b>D614G</b>                             | +                              | +                              |
| <b>P681D</b>                             | +                              | -                              |
| <b>A701V</b>                             | -                              | +                              |
| <b>T716I</b>                             | +                              | -                              |
| <b>S982A</b>                             | +                              | -                              |
| <b>D1118H</b>                            | +                              | -                              |

Table 1. AA substitutions detected in the spike protein of VOCs B.1.1.7 (EPI\_ISL\_601443) and B.1.351 (EPI\_ISL\_678615) compared to Wuhan-Hu-1 (NC\_045512).

Syrian hamsters (N=10 per group) were vaccinated intramuscularly with either ChAdOx1 nCoV-19 or ChAdOx1 green fluorescent protein (GFP,  $2.5 \times 10^8$  IU/hamster) 30 days prior to intranasal challenge with SARS-CoV-2 VOCs B.1.1.7 or B.1.351. Vaccination with ChAdOx1 nCoV19 resulted in high titers of binding antibodies against the SARS-CoV-2 full-length spike protein and receptor binding domain (Figure 1a) at 25 days post vaccination. We then investigated neutralizing antibody titers in serum against infectious virus. Neutralization of B.1.351 was significantly reduced compared to neutralization of B.1.1.7 (Figure 1b, mean titer of 15 vs 142,  $p < 0.0001$ , Mann-Whitney test).

Virus stocks were deep sequenced before inoculation. No mutations were found in B.1.1.7 compared to the isolate's sequence, but two AA substitutions were found in the spike protein of B.1.351; Q677H (present at 88%) and R682W (present at 89%).

Upon inoculation with virus, weight loss was observed in control hamsters challenged with B.1.1.7, whereas less pronounced weight loss was observed in control hamsters challenged with B.1.351 (Figure 1c). In contrast, vaccinated hamsters continued to gain weight throughout the experiment. A significant difference in weight between vaccinated and control hamsters was observed starting at 4 days post infection (DPI) for B.1.1.7 and at 6 DPI for B.1.351 (Figure 1c, Student's t-test corrected for multiple comparisons using the Holm-Šidák method) and continued throughout the remainder of the experiment. Four out of ten hamsters per group were euthanized at 5 DPI and lung tissue was harvested. Lung tissue of all control animals contained high levels of sgRNA (Figure 1d,  $10^8$ - $10^{10}$  copies/gram tissue), and was comparable to sgRNA levels previously detected in lung tissue of control animals challenged with SARS-CoV-2 D614G (hCoV-19/USA/MT-RML-7/2020)<sup>4</sup>. Conversely, no sgRNA was detected in lung tissue obtained from vaccinated hamsters challenged with B.1.1.7, and only one out of four vaccinated hamsters challenged with B.1.351 had detectable sgRNA (Figure 1d,  $p=0.0286$ , Mann-Whitney test). High levels of infectious virus were detected in lung tissue of all eight control animals, whereas no vaccinated animals had detectable infectious virus in lung tissue (Figure 1e,  $p=0.0286$ , Mann-Whitney test). Lung:body weight ratios on 5 DPI were significantly lower in vaccinated animals compared to control animals for both VOCs (Figure 1f,  $p=0.0286$ , Mann-Whitney test), indicating no or reduced pulmonary edema in ChAdOx1 nCoV19-vaccinated animals.

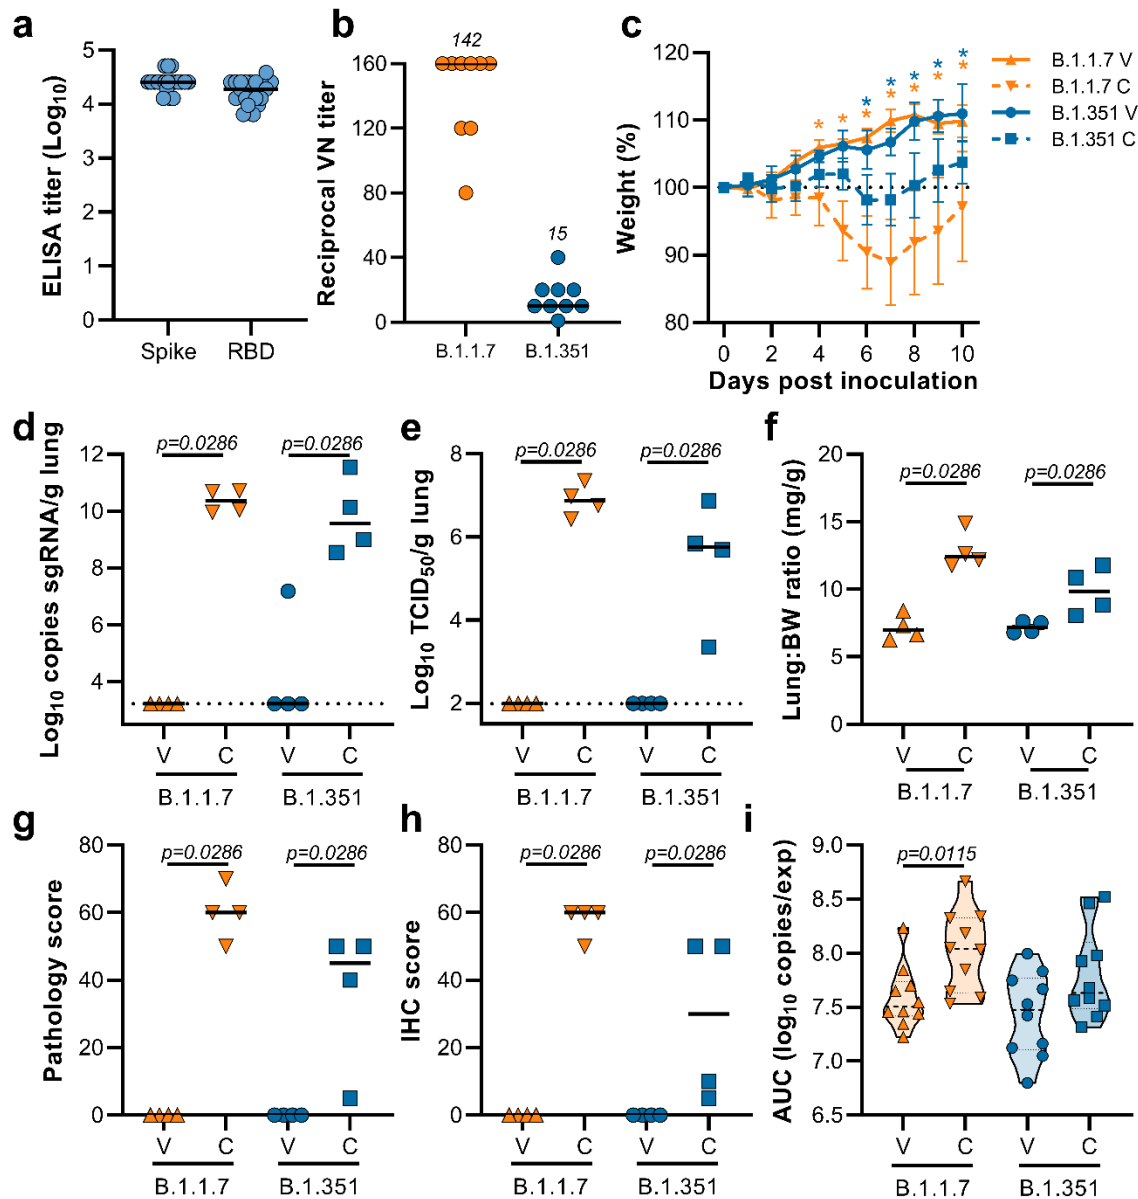

79

**Figure 1. Vaccination of Syrian hamsters with ChAdOx1 nCoV-19 prevents lower respiratory tract infection with SARS-CoV-2 VOCs B.1.1.7 and B.1.351.** a. Binding antibodies against spike protein or RBD of SARS-CoV-2 (clade A) in serum obtained 25 days post vaccination with ChAdOx1 nCoV-19. Line = median; numbers = mean. b. Virus neutralizing antibody titers against B.1.1.7 or B.1.351 VOCs in serum obtained 25 days post vaccination with ChAdOx1 nCoV-19. Line = median. c. Relative weight upon intranasal challenge with 10<sup>4</sup> TCID<sub>50</sub> of B.1.1.7 or B.1.351. Shown is geometric mean with 95% confidence interval (CI). \* = p-value<0.005, corrected for multiple comparisons using the Holm-Šidák correction. d. sgRNA viral load in lung tissue obtained at 5 DPI. Line = median. Dotted

line = limit of detection. e. Infectious SARS-CoV-2 titer in lung tissue obtained at 5 DPI. Line = median. Dotted line = limit of detection. f. Lung:body weight (BW) ratio (mg:g) of hamsters euthanized at 5 DPI. Line = median. g. Percentage affected lung tissue per animal as determined via histology. Line = median. h. Percentage of lung tissue positive for SARS-CoV-2 antigen per animal. Line = median. i. Truncated violin-plot of area under the curve (AUC) analysis of shedding as measured by sgRNA analysis in swabs. Dashed line = median. Dotted line = quartiles. Statistical significance determined via Kruskal-Wallis test (b), mixed-effect analyses (c), or Mann-Whitney test (d-i). V = ChAdOx1 nCoV-19 vaccinated; C = ChAdOx1 GFP vaccinated; Orange upward triangle = Hamsters vaccinated with ChAdOx1 nCoV-19, challenged with B.1.1.7; Orange downward triangle = Hamsters vaccinated with ChAdOx1 GFP, challenged with B.1.1.7; Blue circle = Hamsters vaccinated with ChAdOx1 nCoV-19, challenged with B.1.351; Blue square = Hamsters vaccinated with ChAdOx1 GFP, challenged with B.1.351.

Upon necropsy, lungs from control animals showed gross lesions previously observed in hamsters inoculated with SARS-CoV-2 WA1 or a D614G isolate, with focal areas of hilar consolidation and hyperemia<sup>4,5</sup>. No gross lesions were observed in lung tissue obtained from any of the vaccinated animals (Figure 2a-d). Microscopically, pulmonary lesions of control animals consisted of a moderate to marked broncho-interstitial pneumonia extending into the adjacent alveoli. Bronchi and bronchioles had multifocal necrotic epithelial cells and moderate numbers of infiltrating neutrophils and macrophages. Alveolar septa were expanded by edema fluid and leucocytes. In contrast, vaccinated animals did not show any evidence of SARS-CoV-2 pathology (Figure 2e-l). Immunohistochemistry using a monoclonal antibody against SARS-CoV-2 demonstrated viral antigen in bronchial and bronchiolar epithelium, type I and II pneumocytes as well as pulmonary macrophages within the control animals, but not in vaccinated animals (Figure 2m-p). For the sections of lung evaluated, the percentage of lung tissue showing pathology and the percentage of lung tissue positive for SARS-CoV-2 antigen was determined by a veterinary pathologist blinded to the study group allocations. No pathology nor SARS-CoV-2 antigen was found in lungs of vaccinated animals, but both were abundantly present in lungs of control animals (Figure 1g,h,  $p=0.0286$ , Mann-Whitney test). Finally,



oropharyngeal swabs were collected on 1 to 5 DPI, evaluated for sgRNA, and an area under the curve was calculated per animal to determine the cumulative amount of virus shed. We observed a decrease in the total amount of respiratory shedding for both vaccinated groups compared to control animals, although this was statistically significant for B.1.1.7 only (Figure 1i,  $p=0.0115$ , Mann-Whitney test).

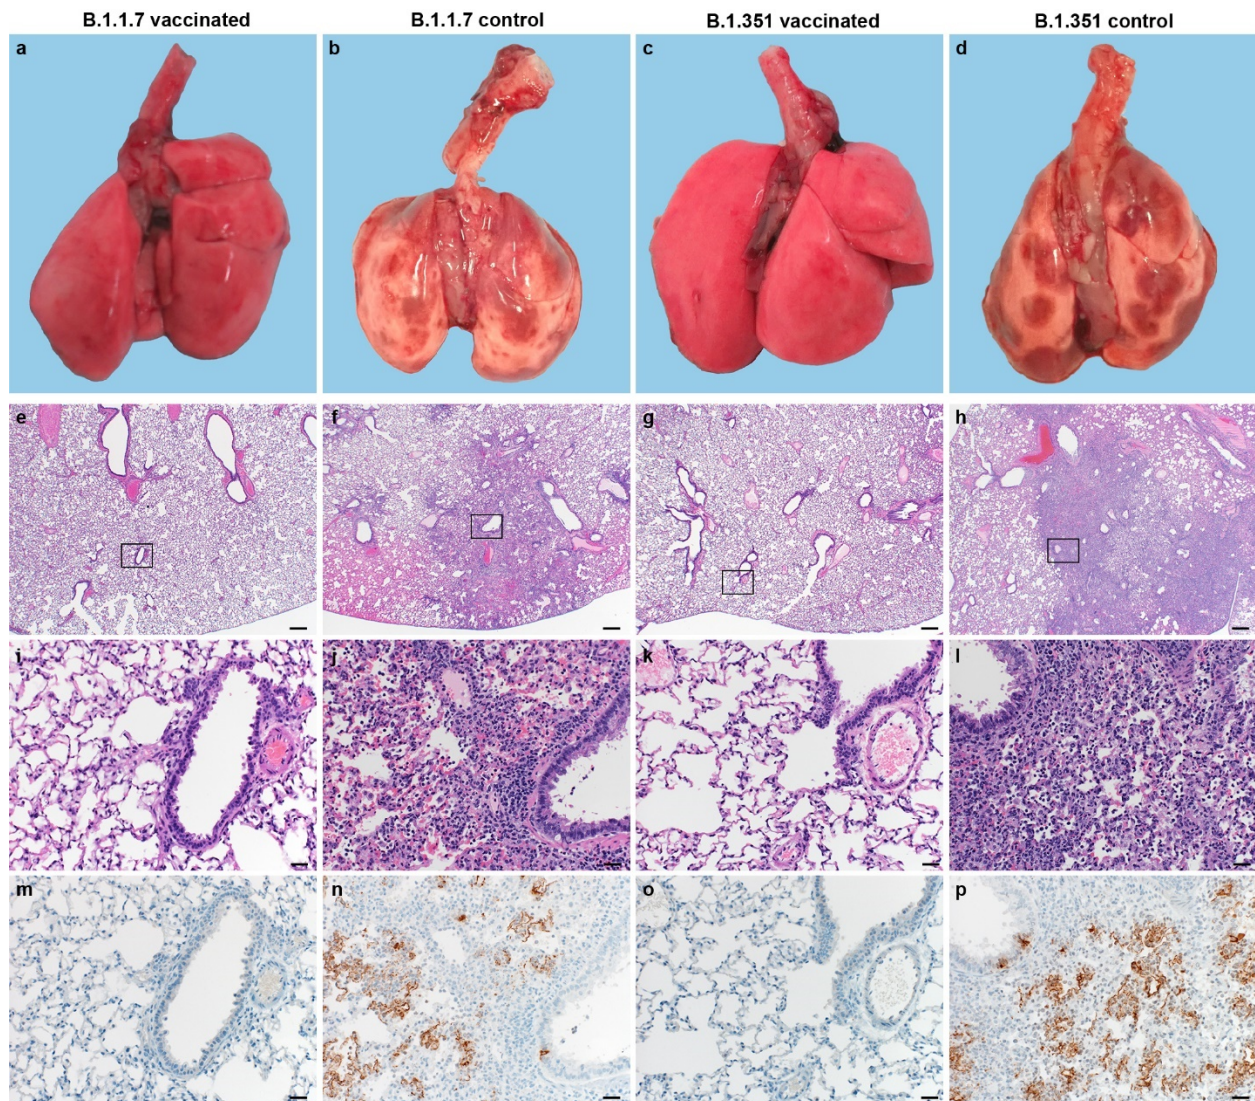

**Figure 2. Pulmonary effects of direct intranasal challenge with SARS-CoV-2 variants B.1.1.7 and B.1.351 in Syrian hamsters at 5 DPI.** a-d. Gross pathology of hamster lungs; a/c. Normal lungs. b/d. Multifocal and focally extensive areas of consolidation. e-h. H&E staining,

20x; e/g. No pathology. f/h. Focally extensive areas of bronchointerstitial pneumonia. i-l. H&E staining, 200x; i/k. No pathology. j/l. Bronchointerstitial pneumonia with alveolar histiocytosis, fibrin and edema. m-p. IHC staining against N protein SARS-CoV-2 (brown). m/o. No staining. n/p. Staining of bronchiolar epithelial cells, type I&II pneumocytes and rare macrophages.

We investigated the presence of the AA substitutions Q677H and R682W observed in 88-89% of the spike protein of our B.1.351 stock in swabs and lung tissue obtained from control animals challenged with B.1.351. Whereas we did find these substitutions in swabs obtained 1 DPI, they were not present in swabs obtained at 5 DPI. Likewise, the substitutions were only found in lung tissue of one out of four control hamsters (Table 2).

| AA substitutions | Presence in swabs<br>(1 DPI, N=5) | Presence in swabs<br>(5 DPI, N=3) | Presence in lungs<br>(N=4) |
|------------------|-----------------------------------|-----------------------------------|----------------------------|
| Q677H            | 44.1-65.7%                        | 0%                                | 0 (N=3), 81% (N=1)         |
| R682W            | 44.9-65.8%                        | 0%                                | 0 (N=3), 81% (N=1)         |

Table 2. Presence of substitutions Q677H and R682W in swabs and lung tissue of hamsters directly inoculated with B.1.351.

This study demonstrates efficacy of the ChAdOx1 nCoV-19 vaccine against circulating variants of concern in the SARS-CoV-2 Syrian hamster model. The Syrian hamster SARS-CoV-2 infection model is characterized by natural susceptibility to SARS-CoV-2 and development of a robust upper and lower respiratory tract infection<sup>6</sup>. The hamster model has been successfully used for the preclinical development of several vaccines including the Ad26 and mRNA-1273 vaccines by Janssen<sup>7</sup> and Moderna<sup>8</sup>, respectively. Several groups have reported the effect of spike protein substitutions observed in B.1.1.7 and B.1.351 VOCs on the virus neutralizing capacity of serum obtained from vaccinated or convalescent individuals. In general, these studies conclude that the substitutions found in the B.1.1.7 spike protein have limited to no effect on virus neutralization titres<sup>9-15</sup>. Data from a UK phase III trial taken from a time when B.1.1.7



predominated, showed minimal impact on ChAdOx1 nCoV-19 vaccine efficacy<sup>15</sup>. Likewise, in an observational study of vaccine effectiveness in adults aged over 70 years in the UK, a single dose of either ChAdOx1 nCoV-19 or the Pfizer/BioNTech vaccine BNT162b2 reduced hospitalization in elderly adults with co-morbidities by 80%<sup>16</sup>. In contrast, the substitutions found in the B.1.351 spike protein (Table 1) result in a significant reduction of virus neutralizing capacity with pseudotype or infectious virus neutralization assays<sup>9–15,17,18</sup>. In a phase II study of ChAdOx1 nCoV-19 in South Africa in 2000 adults with a median age of 31 years, vaccine efficacy against mild to moderate disease was reduced when the virus recovered after infection was B.1.351 (19 cases in the vaccinated group and 20 in the placebo group)<sup>19</sup>. Vaccine efficacy against severe disease could not be determined as no severe cases occurred in this young cohort. The South African arm of the ENSEMBLE study which tested vaccine efficacy after a single dose of Janssen's COVID-19 vaccine candidate enrolled 6,576 participants in South Africa, out of a total of 43,783 in multiple countries, with 34% of participants across the study aged over 60 years. Vaccine efficacy against moderate to severe disease was 64% (CI 41.2%, 78.7%) in South Africa compared to 72% (CI 58.2%, 81.7%) in the USA at 28 days post vaccination<sup>20</sup>. Efficacy of the vaccine against severe to critical disease was 81.7% in South Africa, which was similar to the reported 85.9% and 87.6% in the USA and Brazil, respectively<sup>20</sup>. Vaccine efficacy against mild disease was not reported. These clinical trial results are consistent with the findings of the preclinical study reported here; ChAdOx1 nCov-19 may be less effective at reducing upper respiratory tract infection caused by B.1.351 than by B.1.1.7, consistent with reduced efficacy against mild disease. However, complete protection against lower respiratory tract disease was observed in this challenge study, consistent with protection against severe disease. Based on our

data, we hypothesize that the currently available vaccines will likely still protect against severe disease and hospitalization caused by VOC B.1.351.

Limited data on the immunological determinants of protection are available, however recent data from rhesus macaques indicate that relatively low neutralizing antibody titers are sufficient for protection against SARS-CoV-2, and that cellular immune responses may contribute to protection if antibody responses are suboptimal<sup>21</sup>. Induction of binding and neutralizing antibodies as well as SARS-CoV-2 cellular spike protein-specific T cell responses after vaccination have been reported<sup>22,23</sup> and most SARS-CoV-2 specific T cell epitopes in both convalescent and vaccinated individuals are not affected by the AA substitutions found in the spike protein of the B.1.1.7 and B.1.351 variants<sup>24</sup>. Protection against severe COVID-19 disease might be mediated by T cells and would therefore not be different between the current variants. However, as T cell-mediated protection can only act after the initial infection has occurred, mild, polymerase chain reaction (PCR)-positive disease may still occur in the upper respiratory tract.

It should be noted that the B.1.351 virus stock used to challenge hamsters contained two additional non-fixed AA substitutions; Q677H and R682W at 88% and 89%, respectively. Interestingly, the relative presence of these two AA substitutions was markedly reduced at 1 DPI and absent on 5 DPI. In addition, they were only present in lung tissue of one control hamster at 5 DPI, suggesting that they are rapidly selected against in the SARS-CoV-2 hamster model over the course of infection. Nonetheless, since the substitutions thought to be important in immune evasion, such as E484K<sup>18</sup>, are still present in the virus stock, efficient replication and lung pathology was observed in infected hamsters, we do not believe the presence of these additional AA substitutions present as a quasispecies affect the data interpretation.

Based on the current studies and healthcare priorities in real-world settings, we believe it is essential to focus on prevention of moderate to severe disease requiring hospitalization. We show that ChAdOx1 nCoV-19 vaccination resulted in complete protection against disease in hamsters. As implied by the data presented by Janssen<sup>20</sup>, viral vectored vaccines may provide substantial protection against lower respiratory tract infection caused by the B.1.351 variant and subsequent hospitalization and death. With the ongoing evolution of SARS-CoV-2, the readily available and cost-effective hamster model allows rapid evaluation of the protective efficacy of novel VOCs. In addition, it will allow rapid preclinical benchmarking of existing vaccines against preclinical vaccines with updated antigen designs.

## References

1. Chand, M. *et al.* Investigation of novel SARS-COV-2 variant Variant of Concern 202012/01.
2. Davies, N. G. *et al.* Estimated transmissibility and impact of SARS-CoV-2 lineage B.1.1.7 in England. *Science* eabg3055 (2021) doi:10.1126/science.abg3055.
3. Tegally, H. *et al.* Emergence and rapid spread of a new severe acute respiratory syndrome-related coronavirus 2 (SARS-CoV-2) lineage with multiple spike mutations in South Africa. <http://medrxiv.org/lookup/doi/10.1101/2020.12.21.20248640> (2020) doi:10.1101/2020.12.21.20248640.
4. van Doremalen, N. *et al.* Intranasal ChAdOx1 nCoV-19/AZD1222 vaccination reduces shedding of SARS-CoV-2 D614G in rhesus macaques. <http://biorxiv.org/lookup/doi/10.1101/2021.01.09.426058> (2021) doi:10.1101/2021.01.09.426058.

5. Port, J. R. *et al.* SARS-CoV-2 disease severity and transmission efficiency is increased for airborne but not fomite exposure in Syrian hamsters.  
<http://biorxiv.org/lookup/doi/10.1101/2020.12.28.424565> (2020)  
doi:10.1101/2020.12.28.424565.
6. Muñoz-Fontela, C. *et al.* Animal models for COVID-19. *Nature* **586**, 509–515 (2020).
7. Tostanoski, L. H. *et al.* Ad26 vaccine protects against SARS-CoV-2 severe clinical disease in hamsters. *Nat Med* **26**, 1694–1700 (2020).
8. Meyer, M. *et al.* mRNA-1273 efficacy in a severe COVID-19 model: attenuated activation of pulmonary immune cells after challenge.  
<http://biorxiv.org/lookup/doi/10.1101/2021.01.25.428136> (2021)  
doi:10.1101/2021.01.25.428136.
9. Liu, Y. *et al.* Neutralizing Activity of BNT162b2-Elicited Serum — Preliminary Report. *N Engl J Med* NEJMc2102017 (2021) doi:10.1056/NEJMc2102017.
10. Zhou, D. *et al.* Evidence of escape of SARS-CoV-2 variant B.1.351 from natural and vaccine induced sera. *Cell* S0092867421002269 (2021) doi:10.1016/j.cell.2021.02.037.
11. Planas, D. *et al.* Sensitivity of infectious SARS-CoV-2 B.1.1.7 and B.1.351 variants to neutralizing antibodies. <http://biorxiv.org/lookup/doi/10.1101/2021.02.12.430472> (2021)  
doi:10.1101/2021.02.12.430472.
12. Wang, P. *et al.* Antibody Resistance of SARS-CoV-2 Variants B.1.351 and B.1.1.7.  
<http://biorxiv.org/lookup/doi/10.1101/2021.01.25.428137> (2021)  
doi:10.1101/2021.01.25.428137.

13. Wu, K. *et al.* *mRNA-1273 vaccine induces neutralizing antibodies against spike mutants from global SARS-CoV-2 variants*. <http://biorxiv.org/lookup/doi/10.1101/2021.01.25.427948> (2021) doi:10.1101/2021.01.25.427948.
14. Xie, X. *et al.* Neutralization of SARS-CoV-2 spike 69/70 deletion, E484K and N501Y variants by BNT162b2 vaccine-elicited sera. *Nat Med* (2021) doi:10.1038/s41591-021-01270-4.
15. Emary, K. R. W. *et al.* Efficacy of ChAdOx1 nCoV-19/AZD1222 Vaccine Against SARS-CoV-2 VOC (B.1.1.7). *SSRN Journal* (2021) doi:10.2139/ssrn.3779160.
16. Hyams, C. *et al.* Assessing the Effectiveness of BNT162b2 and ChAdOx1nCoV-19 COVID-19 Vaccination in Prevention of Hospitalisations in Elderly and Frail Adults: A Single Centre Test Negative Case-Control Study. *Lancet*.
17. Cele, S. *et al.* *Escape of SARS-CoV-2 501Y.V2 from neutralization by convalescent plasma*. <http://medrxiv.org/lookup/doi/10.1101/2021.01.26.21250224> (2021) doi:10.1101/2021.01.26.21250224.
18. Greaney, A. J. *et al.* *Comprehensive mapping of mutations to the SARS-CoV-2 receptor-binding domain that affect recognition by polyclonal human serum antibodies*. <http://biorxiv.org/lookup/doi/10.1101/2020.12.31.425021> (2021) doi:10.1101/2020.12.31.425021.
19. Madhi, S. A. *et al.* *Safety and efficacy of the ChAdOx1 nCoV-19 (AZD1222) Covid-19 vaccine against the B.1.351 variant in South Africa*. <http://medrxiv.org/lookup/doi/10.1101/2021.02.10.21251247> (2021) doi:10.1101/2021.02.10.21251247.



20. Janssen. Emergency Use Authorization (EUA) for an Unapproved Product Review Memorandum.
21. McMahan, K. *et al.* Correlates of protection against SARS-CoV-2 in rhesus macaques. *Nature* (2020) doi:10.1038/s41586-020-03041-6.
22. the Oxford COVID Vaccine Trial Group *et al.* T cell and antibody responses induced by a single dose of ChAdOx1 nCoV-19 (AZD1222) vaccine in a phase 1/2 clinical trial. *Nat Med* **27**, 270–278 (2021).
23. Sahin, U. *et al.* COVID-19 vaccine BNT162b1 elicits human antibody and TH1 T cell responses. *Nature* **586**, 594–599 (2020).
24. Tarke, A. *et al.* Negligible impact of SARS-CoV-2 variants on CD4<sup>+</sup> and CD8<sup>+</sup> T cell reactivity in COVID-19 exposed donors and vaccinees. <http://biorxiv.org/lookup/doi/10.1101/2021.02.27.433180> (2021) doi:10.1101/2021.02.27.433180.

## Acknowledgments

We would like to thank Mukul Ranjan, Sujatha Rashid, Kimberly Stemple, Alan Sutherland, Anita Mora, Kizzmekia Corbett, Barney Graham, Florian Krammer, Fatima Amanat, Victoria Avanzato, and the animal care takers for their assistance during the study. The following reagent was obtained through BEI Resources, NIAID, NIH: SARS-Related Coronavirus 2, Isolate hCoV-19/South Africa/KRISP-K005325/2020, NR-54009, contributed by Alex Sigal and Tulio de Oliveira, and SARS-Related Coronavirus 2, Isolate hCoV-19/England/204820464/2020, NR-54000, contributed by Bassam Hallis.

**Funding:** This work was supported by the Intramural Research Program of the National Institute of Allergy and Infectious Diseases (NIAID), National Institutes of Health (NIH) (1ZIAAI001179-01) and the Department of Health and Social Care using UK Aid funding managed by the NIHR.

**Author contributions:** N.v.D. and V.J.M. designed the studies, S.C.G. and T.L. designed and provided the vaccine, R.J.F., N.v.D., D.R.A., C.K.Y, J.R.P., M.G.H., J.E.S., B.N.W., T.T., K.B., S.L.A., S.R, B.J.S., D.L., C.M., G.S, E.d.W., and V.J.M. performed the experiments, R.J.F., N.v.D., D.R.A., C.K.Y, J.R.P., M.G.H., J.E.S., S.L.A., C.M., G.S, and V.J.M. analyzed results, R.J.F., N.v.D and D.R.A. wrote the manuscript, all co-authors reviewed the manuscript.;

**Competing interests:** S.C.G. is a board member of Vaccitech and named as an inventor on a patent covering the use of ChAdOx1-vector-based vaccines and a patent application covering a SARS-CoV-2 (nCoV-19) vaccine (UK patent application no. 2003670.3). T.L. is named as an inventor on a patent application covering a SARS-CoV-2 (nCoV-19) vaccine (UK patent application no. 2003670.3). The University of Oxford and Vaccitech, having joint rights in the vaccine, entered into a partnership with AstraZeneca in April 2020 for further development, large-scale manufacture and global supply of the vaccine. Equitable access to the vaccine is a key component of the partnership. Neither Oxford University nor Vaccitech will receive any royalties during the pandemic period or from any sales of the vaccine in developing countries. All other authors declare no competing interests.

**Materials and Correspondence:** All material requests should be sent to Vincent J. Munster, [vincent.munster@nih.gov](mailto:vincent.munster@nih.gov).

**Materials and Methods**

## *Ethics Statement*

All animal experiments were conducted in an AAALAC International-accredited facility and were approved by the Rocky Mountain Laboratories Institutional Care and Use Committee following the guidelines put forth in the Guide for the Care and Use of Laboratory Animals 8<sup>th</sup> edition, the Animal Welfare Act, United States Department of Agriculture and the United States Public Health Service Policy on the Humane Care and Use of Laboratory Animals. The Institutional Biosafety Committee (IBC) approved work with infectious SARS-CoV-2 virus strains under BSL3 conditions. Virus inactivation of all samples was performed according to IBC-approved standard operating procedures for the removal of specimens from high containment areas.

## *Cells and virus*

SARS-CoV-2 variant B.1.351 (hCoV-19/South African/KRISP-K005325/2020, EPI\_ISL\_678615) was obtained from Dr. Tulio de Oliveira and Dr. Alex Sigal at the Nelson R Mandela School of Medicine, UKZN. SARS-CoV-2 variant B.1.1.7 (hCoV-19/England/204820464/2020, EPI\_ISL\_683466) was obtained from Public Health England via BEI. Virus propagation was performed in VeroE6 cells in DMEM supplemented with 2% fetal bovine serum, 1 mM L-glutamine, 50 U/ml penicillin and 50 µg/ml streptomycin (DMEM2). VeroE6 cells were maintained in DMEM supplemented with 10% fetal bovine serum, 1 mM L-glutamine, 50 U/ml penicillin and 50 µg/ml streptomycin. Mycoplasma testing is performed at regular intervals and no mycoplasma was detected.

## *Animal Experiments*

ChAdOx1 nCoV-19 was formulated as previously described<sup>25</sup>. Four groups of 10, 4-6-week-old female Syrian hamsters (Envigo Indianapolis, IN) were vaccinated with  $2.5 \times 10^8$  infectious units

of ChAdOx1 nCoV-19 vaccine or ChAdOx1-GFP delivered intramuscularly in two 50  $\mu$ L doses into the posterior thighs 30 days prior to challenge. Five days prior to challenge a blood sample was collected via the retro-orbital plexus under isoflurane anesthesia and spun at 2000 g for 10 min to obtain serum. Two groups (10 ChAdOx1 nCoV-19 vaccinated and 10 ChAdOx1 GFP vaccinated hamsters) were challenged with  $10^4$  TCID<sub>50</sub>/mL B.1.1.7 diluted in sterile Dulbecco's Modified Eagle's media (DMEM), in a 40  $\mu$ L bolus delivered intranasally, one-half into each nostril. Two other groups (10 ChAdOx1 nCoV-19 vaccinated and 10 ChAdOx1 GFP vaccinated hamsters) were similarly challenged with B.1.351 also diluted in sterile DMEM. Weights were recorded daily until 14 DPI. Oropharyngeal swabs were collected daily in 1 mL of DMEM2 up until 5 DPI. On 5 DPI 4 animals from each group were euthanized. The lungs were excised, weighed, and photographed, and samples taken for qRT-PCR analysis, virus titrations and histopathology. The remaining six animals in each group were monitored daily for signs of disease and weighed until 14 DPI.

#### *Virus titration*

Lung sections were weighed and homogenized in 1 mL of DMEM. Virus titrations were performed by end-point titration of 10-fold dilutions of virus swab media or tissue homogenates on VeroE6 cells in 96-well plates. When titrating tissue homogenate, the top 2 rows of cells were washed 2 times with PBS prior to the addition of a final 100  $\mu$ L of DMEM2. Cells were incubated at 37°C and 5% CO<sub>2</sub>. Cytopathic effect was read 6 days later.

#### *Virus neutralization*

Sera were heat-inactivated (30 min, 56 °C). After an initial 1:10 dilution of the sera, two-fold serial dilutions were prepared in DMEM2. 100 TCID<sub>50</sub> of SARS-CoV-2 variant B.1.1.7 or B.1.351 was added to the diluted sera. After a 1hr incubation at 37°C and 5% CO<sub>2</sub>, the virus-

serum mixture was added to VeroE6 cells. The cells were incubated for 6 days at 37°C and 5% CO<sub>2</sub> at which time they were evaluated for CPE. The virus neutralization titer was expressed as the reciprocal value of the highest dilution of the serum that still inhibited virus replication.

#### *RNA extraction and quantitative reverse-transcription polymerase chain reaction*

RNA was extracted from oropharyngeal swabs using the QiaAmp Viral RNA kit (Qiagen) according to the manufacturer's instructions and following high containment laboratory protocols. Lung samples were homogenized and extracted using the RNeasy kit (Qiagen) according to the manufacturer's instructions and following high containment laboratory protocols. A viral sgRNA<sup>26</sup> specific assay was used for the detection of viral RNA. Five µL of extracted RNA was tested with the Quantstudio 3 system (Thermofisher) according to instructions from the manufacturer. A standard curve was generated during each run using SARS-CoV-2 standards containing a known number of genome copies.

#### *Viral RNA sequencing*

For sequencing from viral stocks, sequencing libraries were prepared using Stranded Total RNA Prep Ligation with Ribo-Zero Plus kit per manufacturer's protocol (Illumina) and sequenced on an Illumina MiSeq at 2 x 150 base pair reads. For sequencing from swab and lung tissue, total RNA was depleted of ribosomal RNA using the Ribo-Zero Gold rRNA Removal kit (Illumina). Sequencing libraries were constructed using the KAPA RNA HyperPrep kit following manufacturer's protocol (Roche Sequencing Solutions). To enrich for SARS-CoV-2 sequence, libraries were hybridized to myBaits Expert Virus biotinylated oligonucleotide baits following the manufacturer's manual, version 4.01 (Arbor Biosciences, Ann Arbor, MI). Enriched libraries were sequenced on the Illumina MiSeq instrument as paired-end 2 X 151 base pair reads. Raw fastq reads were trimmed of Illumina adapter sequences using cutadapt version 1.12<sup>27</sup> and then



trimmed and filtered for quality using the FASTX-Toolkit (Hannon Lab, CSHL). Remaining reads were mapped to the SARS-CoV-2 2019-nCoV/USA-WA1/2020 genome (MN985325.1) or hCoV-19/England/204820464/2020 (EPI\_ISL\_683466) or hCoV-19/SouthAfrica/KRISP-K005325/2020 (EPI\_ISL\_678615) using Bowtie2 version 2.2.9<sup>28</sup> with parameters --local --no-mixed -X 1500. PCR duplicates were removed using picard MarkDuplicates (Broad Institute) and variants were called using GATK HaplotypeCaller version 4.1.2.0<sup>29</sup> with parameter -ploidy 2. Variants were filtered for QUAL > 500 and DP > 20 using bcftools.

### *Expression and purification of SARS-CoV-2 S and receptor binding domain*

Protein production was performed as described previously<sup>30,31</sup>. Expression plasmids encoding the codon optimized SARS-CoV-2 full length S and RBD were obtained from Kizzmekia Corbett and Barney Graham (Vaccine Research Center, Bethesda, USA)<sup>32</sup> and Florian Krammer (Icahn School of Medicine at Mt. Sinai, New York, USA)<sup>33</sup>. Expression was performed in Freestyle 293-F cells (Thermofisher), maintained in Freestyle 293 Expression Medium (Gibco) at 37°C and 8% CO<sub>2</sub> shaking at 130 rpm. Cultures totaling 500 mL were transfected with PEI at a density of one million cells per mL. Supernatant was harvested 7 days post transfection, clarified by centrifugation and filtered through a 0.22 µm membrane. The protein was purified using Ni-NTA immobilized metal-affinity chromatography (IMAC) using Ni Sepharose 6 Fast Flow Resin (GE Lifesciences) or NiNTA Agarose (QIAGEN) and gravity flow. After elution the protein was buffer exchanged into 10 mM Tris pH8, 150 mM NaCl buffer (S) or PBS (RBD) and stored at –80°C.

### *ELISA*

ELISA was performed as described previously<sup>25</sup>. Briefly, maxisorp plates (Nunc) were coated overnight at 4°C with 50 ng/well S or RBD protein in PBS. Plates were blocked with 100 µl of

casein in PBS (Thermo Fisher) for 1hr at RT. Serum diluted 1:6,400 was further 2-fold serially diluted in casein in PBS was incubated at RT for 1hr. Antibodies were detected using affinity-purified polyclonal antibody peroxidase-labeled goat-anti-monkey IgG (Seracare, 074-11-021) in casein followed by TMB 2-component peroxidase substrate (Seracare, 5120-0047). The reaction was stopped using stop solution (Seracare, 5150-0021) and read at 450 nm. All wells were washed 4x with PBST 0.1% tween in between steps. Threshold for positivity was set at 2x OD value of negative control (serum obtained from unvaccinated hamsters prior to start of the experiment).

#### *Data availability statement*

Data have been deposited in Figshare

#### **References Materials and Methods**

25. van Doremalen, N. *et al.* ChAdOx1 nCoV-19 vaccine prevents SARS-CoV-2 pneumonia in rhesus macaques. *Nature* **586**, 578–582 (2020).
26. Corman, V. M. *et al.* Detection of 2019 novel coronavirus (2019-nCoV) by real-time RT-PCR. *Eurosurveillance* **25**, (2020).
27. Rothe, C. *et al.* Transmission of 2019-nCoV Infection from an Asymptomatic Contact in Germany. *The New England journal of medicine* (2020) doi:10/ggivr8.
28. Avanzato, V. A. *et al.* Case Study: Prolonged Infectious SARS-CoV-2 Shedding from an Asymptomatic Immunocompromised Individual with Cancer. *Cell* S0092867420314562 (2020) doi:10.1016/j.cell.2020.10.049.

- 419 29. Stadlbauer, D. *et al.* SARS-CoV-2 Seroconversion in Humans: A Detailed Protocol for a  
420 Serological Assay, Antigen Production, and Test Setup. *Current Protocols in Microbiology*  
421 **57**, (2020).
- 422 30. Wrapp, D. *et al.* Cryo-EM structure of the 2019-nCoV spike in the prefusion conformation.  
423 *Science* **367**, 1260–1263 (2020).
- 424 31. Amanat, F. *et al.* A serological assay to detect SARS-CoV-2 seroconversion in humans. *Nat*  
425 *Med* **26**, 1033–1036 (2020).
